# Supplementary material for: Nasopharyngeal Expression of Angiotensin-Converting Enzyme 2 (ACE2) and Transmembrane Serine Protease 2 (TMPRSS2) in Children Compared to Adults Within Family Clusters Exposed to COVID-19
Source: Research Square preprint supplement (doi:10.21203/rs.3.rs-208994/v1), 2021-03-09
Supplement: Supplementary file 1 [file 2a5548b87a69fa8bc0654e36.docx]

**Supplemental table 1: Nasopharyngeal ACE2 and TMPRSS2 gene expression in COVID-19 positive versus negative patients**

| **Population** | **Gene** | **#Mean ΔCt ± SD** | | ****p*-value** |
| --- | --- | --- | --- | --- |
| **COVID-19 positive** | **COVID-19 negative** |
| Overall | ACE2 | -11.20±4.36 | -12.38±3.75 | 0.0903 |
| TMPRSS2 | -9.19±3.72 | -9.82±3.96 | 0.2649 |
| Adult | ACE2 | -10.53±4.47 | -11.62±3.25 | 0.3817 |
| TMPRSS2 | -8.75±3.55 | -8.85±3.44 | 0.7288 |
| Children | ACE2 | -12.26±4.02 | -13.09±4.08 | 0.2490 |
| TMPRSS2 | -9.87±3.93 | -10.82±4.23 | 0.3325 |
| Adult in families with at least one positive child | ACE2 | -10.49±4.23 | -11.86±3.176 | 0.3120 |
| TMPRSS2 | -8.35±3.929 | -9.44±3.35 | 0.3350 |
| Children in families with at least one COVID-19 positive adult | ACE2 | -11.38±3.98 | -13.09±4.08 | 0.1218 |
| TMPRSS2 | -9.03±3.87 | -10.72±4.24 | 0.2263 |

**p*-values were calculated by two tailed, Mann-Whitney U test

#ΔCt values were calculated by subtracting the Ct values for ACE2 or TMPRSS2 from the respective Ct values for the house-keeping gene β-actin.
